# Supplementary material for: TSPO is a potential independent prognostic factor associated with cellular respiration and p16 in head and neck squamous cell carcinoma
Source: PubMed Central journal article supplement (PMC10755888; doi:10.3389/fonc.2023.1298333), 2023-12-14
Supplement: DataSheet_1.pdf [file DataSheet_1.pdf]

## **TSPO is a potential independent prognostic factor associated with cellular respiration and p16 in head and neck squamous cell carcinoma**

Sanni Tuominen<sup>1,2,3</sup>, Linda Nissi<sup>4</sup>, Antti Kukkula<sup>2</sup>, Johannes Routila<sup>5</sup>, Teemu Huusko<sup>5</sup>, Ilmo Leivo<sup>6</sup>, Heikki Minn<sup>4</sup>, Heikki Irjala<sup>5</sup>, Eliisa Löyttyniemi<sup>7</sup>, Sami Ventelä<sup>5</sup>, Maria Sundvall<sup>2,4</sup> and Tove J. Grönroos<sup>1,3,4</sup>

<sup>1</sup>Preclinical Imaging Laboratory, Turku PET Centre, University of Turku, Turku, Finland

<sup>2</sup>Cancer Research Unit, Institute of Biomedicine, and FICAN West Cancer Research Laboratory, Turku University Hospital and University of Turku, Turku, Finland

<sup>3</sup>Medicity Research Laboratory, Faculty of Medicine, University of Turku, Turku, Finland

<sup>4</sup>Department of Clinical Oncology, Turku University Hospital and University of Turku, Turku, Finland

<sup>5</sup>Department of Otorhinolaryngology – Head and Neck Surgery, Turku University Hospital and University of Turku, Turku, Finland

<sup>6</sup>Department of Pathology, Turku University Hospital and University of Turku, Turku, Finland

<sup>7</sup>Department of Biostatistics, Turku University Hospital and University of Turku, Turku, Finland

**Supplementary Table S1.** The number of patients with HNSCC in subgroups from which *TSPO* expression was available and used in the *in silico* analyses from the TCGA cohort.

|                    |                     | No. of patients | <i>TSPO</i> mRNA level<br>(log <sub>2</sub> (norm_value+1)) | Data version |
|--------------------|---------------------|-----------------|-------------------------------------------------------------|--------------|
| <b>Sample type</b> | Solid tissue normal | 74              | 44                                                          | 2019-12-06   |
|                    | Primary             | 528             | 520                                                         |              |
|                    | Total               | 609             | 566                                                         |              |
| <b>Site</b>        | Alveolar ridge      | 18              | 18                                                          | 2019-12-06   |
|                    | Base of tongue      | 27              | 27                                                          |              |
|                    | Buccal mucosa       | 23              | 22                                                          |              |
|                    | Floor of mouth      | 63              | 62                                                          |              |
|                    | Hard palate         | 7               | 7                                                           |              |
|                    | Hypopharynx         | 10              | 10                                                          |              |
|                    | Larynx              | 117             | 116                                                         |              |
|                    | Lip                 | 3               | 3                                                           |              |
|                    | Oral cavity         | 73              | 73                                                          |              |
|                    | Oral tongue         | 133             | 130                                                         |              |
|                    | Oropharynx          | 9               | 9                                                           |              |
|                    | Tonsil              | 45              | 43                                                          |              |
|                    | Total               | 528             | 520                                                         |              |
|                    | Missing             | 0               | 0                                                           |              |
| <b>T</b>           | T1                  | 37              | 35                                                          | 2019-12-06   |
|                    | T2                  | 152             | 151                                                         |              |
|                    | T3                  | 139             | 135                                                         |              |
|                    | T4                  | 25              | 25                                                          |              |
|                    | T4a                 | 156             | 155                                                         |              |
|                    | T4b                 | 3               | 3                                                           |              |
|                    | TX                  | 12              | 12                                                          |              |
|                    | Total               | 524             | 516                                                         |              |
|                    | Missing             | 4               | 4                                                           |              |
| <b>N</b>           | N0                  | 246             | 244                                                         | 2019-12-06   |
|                    | N1                  | 85              | 83                                                          |              |
|                    | N2                  | 19              | 19                                                          |              |
|                    | N2a                 | 17              | 17                                                          |              |
|                    | N2b                 | 85              | 81                                                          |              |
|                    | N2c                 | 45              | 45                                                          |              |
|                    | N3                  | 9               | 9                                                           |              |
|                    | NX                  | 18              | 18                                                          |              |
|                    | Total               | 524             | 516                                                         |              |
|                    | Missing             | 4               | 4                                                           |              |
| <b>Stage</b>       | I                   | 21              | 20                                                          | 2019-12-06   |
|                    | II                  | 99              | 98                                                          |              |
|                    | III                 | 107             | 105                                                         |              |
|                    | IVA                 | 269             | 265                                                         |              |
|                    | IVB                 | 11              | 11                                                          |              |
|                    | IVC                 | 7               | 7                                                           |              |
|                    | Total               | 514             | 506                                                         |              |
|                    | Missing             | 14              | 14                                                          |              |
| <b>Grade</b>       | G1                  | 63              | 62                                                          | 2019-12-06   |
|                    | G2                  | 311             | 304                                                         |              |
|                    | G3                  | 125             | 125                                                         |              |
|                    | G4                  | 7               | 7                                                           |              |
|                    | GX                  | 18              | 18                                                          |              |
|                    | Total               | 524             | 516                                                         |              |
|                    | Missing             | 4               | 4                                                           |              |
| <b>p16</b>         | Negative            | 74              | 73                                                          | 2019-12-06   |
|                    | Positive            | 41              | 38                                                          |              |
|                    | Total               | 115             | 111                                                         |              |
|                    | Missing             | 413             | 409                                                         |              |

**Supplementary Table S2.** Top 100 genes with the highest positive expression with *TSPO*.

| Correlated gene   | Cytoband | Spearman's correlation | p-Value  | q-Value  |
|-------------------|----------|------------------------|----------|----------|
| <i>MPST</i>       | 22q12.3  | 0.661                  | 1.31E-62 | 2.64E-58 |
| <i>NOL12</i>      | 22q13.1  | 0.604                  | 6.07E-50 | 6.08E-46 |
| <i>UQCR10</i>     | 22q12.2  | 0.597                  | 1.68E-48 | 1.12E-44 |
| <i>TRABD</i>      | 22q13.33 | 0.588                  | 1.02E-46 | 3.41E-43 |
| <i>RBX1</i>       | 22q13.2  | 0.587                  | 1.29E-46 | 3.71E-43 |
| <i>SMDT1</i>      | 22q13.2  | 0.569                  | 3.91E-43 | 9.81E-40 |
| <i>MCAT</i>       | 22q13.2  | 0.567                  | 6.36E-43 | 1.42E-39 |
| <i>TXN2</i>       | 22q12.3  | 0.565                  | 1.97E-42 | 3.58E-39 |
| <i>NDUFB7</i>     | 19p13.12 | 0.562                  | 4.83E-42 | 6.92E-39 |
| <i>COMTD1</i>     | 10q22.2  | 0.559                  | 1.61E-41 | 1.61E-38 |
| <i>PMVK</i>       | 1q21.3   | 0.553                  | 1.75E-40 | 1.52E-37 |
| <i>PGLS</i>       | 19p13.11 | 0.553                  | 1.86E-40 | 1.55E-37 |
| <i>MIF</i>        | 22q11.23 | 0.551                  | 4.66E-40 | 3.60E-37 |
| <i>NDUFA6</i>     | 22q13.2  | 0.548                  | 1.26E-39 | 9.40E-37 |
| <i>STAP2</i>      | 19p13.3  | 0.546                  | 2.63E-39 | 1.82E-36 |
| <i>RPS19BP1</i>   | 22q13.1  | 0.545                  | 4.50E-39 | 2.79E-36 |
| <i>SNU13</i>      | 22q13.2  | 0.545                  | 4.58E-39 | 2.79E-36 |
| <i>SELENOO</i>    | 22q13.33 | 0.543                  | 9.53E-39 | 5.46E-36 |
| <i>SCO2</i>       | 22q13.33 | 0.543                  | 1.08E-38 | 5.99E-36 |
| <i>MVB12A</i>     | 19p13.11 | 0.539                  | 4.05E-38 | 2.20E-35 |
| <i>GGA1</i>       | 22q13.1  | 0.535                  | 1.62E-37 | 8.35E-35 |
| <i>FBXL15</i>     | 10q24.32 | 0.534                  | 2.17E-37 | 1.09E-34 |
| <i>HSPB1</i>      | 7q11.23  | 0.531                  | 6.67E-37 | 3.04E-34 |
| <i>PMM1</i>       | 22q13.2  | 0.531                  | 7.31E-37 | 3.26E-34 |
| <i>GIPC1</i>      | 19p13.12 | 0.531                  | 8.21E-37 | 3.58E-34 |
| <i>NDUFA13</i>    | 19p13.11 | 0.524                  | 1.04E-35 | 3.78E-33 |
| <i>COPE</i>       | 19p13.11 | 0.522                  | 1.78E-35 | 5.93E-33 |
| <i>COX4I1</i>     | 16q24.1  | 0.520                  | 3.16E-35 | 9.74E-33 |
| <i>RPS15</i>      | 19p13.3  | 0.519                  | 4.47E-35 | 1.32E-32 |
| <i>WDR83OS</i>    | 19p13.13 | 0.519                  | 4.93E-35 | 1.42E-32 |
| <i>ZNF524</i>     | 19q13.42 | 0.519                  | 5.35E-35 | 1.51E-32 |
| <i>VAMP8</i>      | 2p11.2   | 0.518                  | 7.03E-35 | 1.93E-32 |
| <i>AURKAIP1</i>   | 1p36.33  | 0.518                  | 8.48E-35 | 2.24E-32 |
| <i>ATP5F1D</i>    | 19p13.3  | 0.517                  | 9.23E-35 | 2.37E-32 |
| <i>ZMAT5</i>      | 22q12.2  | 0.517                  | 1.06E-34 | 2.65E-32 |
| <i>POLR2F</i>     | 22q13.1  | 0.516                  | 1.38E-34 | 3.37E-32 |
| <i>COX8A</i>      | 11q13.1  | 0.516                  | 1.53E-34 | 3.66E-32 |
| <i>PICK1</i>      | 22q13.1  | 0.514                  | 2.60E-34 | 5.80E-32 |
| <i>RPS9</i>       | 19q13.42 | 0.514                  | 3.19E-34 | 6.94E-32 |
| <i>TRAPPC5</i>    | 19p13.2  | 0.513                  | 4.88E-34 | 1.04E-31 |
| <i>GUK1</i>       | 1q42.13  | 0.512                  | 5.28E-34 | 1.09E-31 |
| <i>TRADD</i>      | 16q22.1  | 0.511                  | 7.21E-34 | 1.46E-31 |
| <i>CCDC124</i>    | 19p13.11 | 0.510                  | 1.06E-33 | 2.09E-31 |
| <i>TEN1</i>       | 17q25.1  | 0.509                  | 1.55E-33 | 2.94E-31 |
| <i>FAM98C</i>     | 19q13.2  | 0.509                  | 1.66E-33 | 3.12E-31 |
| <i>GADD45GIP1</i> | 19p13.13 | 0.507                  | 3.17E-33 | 5.73E-31 |
| <i>SGSM3</i>      | 22q13.1  | 0.504                  | 7.20E-33 | 1.27E-30 |
| <i>STUB1</i>      | 16p13.3  | 0.504                  | 7.58E-33 | 1.32E-30 |
| <i>HSPB1P1</i>    | 9q21.13  | 0.504                  | 9.22E-33 | 1.58E-30 |
| <i>ILVBL</i>      | 19p13.12 | 0.503                  | 1.25E-32 | 2.08E-30 |
| <i>TRIR</i>       | 19p13.13 | 0.502                  | 1.50E-32 | 2.44E-30 |
| <i>TBC1D22A</i>   | 22q13.31 | 0.500                  | 3.31E-32 | 4.99E-30 |
| <i>NME3</i>       | 16p13.3  | 0.499                  | 3.83E-32 | 5.69E-30 |
| <i>DDT</i>        | 22q11.23 | 0.499                  | 4.19E-32 | 6.18E-30 |
| <i>PRR34-AS1</i>  | 22q13.31 | 0.499                  | 4.40E-32 | 6.44E-30 |
| <i>COQ4</i>       | 9q34.11  | 0.498                  | 5.12E-32 | 7.38E-30 |

**Supplementary Table S2 (continued).** Top 100 genes with the highest positive expression with *TSPO*.

| <b>Correlated Gene</b> | <b>Cytoband</b> | <b>Spearman's correlation</b> | <b>p-Value</b> | <b>q-Value</b> |
|------------------------|-----------------|-------------------------------|----------------|----------------|
| <i>MRPS34</i>          | 16p13.3         | 0.498                         | 6.72E-32       | 9.43E-30       |
| <i>RPL36</i>           | 19p13.3         | 0.497                         | 7.33E-32       | 1.02E-29       |
| <i>ECHS1</i>           | 10q26.3         | 0.496                         | 1.12E-31       | 1.53E-29       |
| <i>NDUFA11</i>         | 19p13.3         | 0.495                         | 1.61E-31       | 2.19E-29       |
| <i>PERM1</i>           | 1p36.33         | 0.494                         | 1.98E-31       | 2.65E-29       |
| <i>EDF1</i>            | 9q34.3          | 0.493                         | 2.56E-31       | 3.36E-29       |
| <i>TMEM134</i>         | 11q13.2         | 0.493                         | 3.48E-31       | 4.47E-29       |
| <i>RPL18A</i>          | 19p13.11        | 0.492                         | 4.21E-31       | 5.28E-29       |
| <i>ARF5</i>            | 7q32.1          | 0.491                         | 5.20E-31       | 6.36E-29       |
| <i>COPS9</i>           | 2q37.3          | 0.491                         | 5.30E-31       | 6.45E-29       |
| <i>UBA52</i>           | 19p13.1-p12     | 0.490                         | 6.81E-31       | 8.04E-29       |
| <i>ATP5MK</i>          | 10q24.33        | 0.490                         | 7.71E-31       | 8.99E-29       |
| <i>NDUFS7</i>          | 19p13.3         | 0.490                         | 8.12E-31       | 9.42E-29       |
| <i>SSNA1</i>           | 9q34.3          | 0.489                         | 1.08E-30       | 1.23E-28       |
| <i>UQCRQ</i>           | 5q31.1          | 0.489                         | 1.17E-30       | 1.32E-28       |
| <i>PYM1</i>            | 12q13.2         | 0.488                         | 1.30E-30       | 1.46E-28       |
| <i>S100A16</i>         | 1q21.3          | 0.488                         | 1.51E-30       | 1.68E-28       |
| <i>JOSD2</i>           | 19q13.33        | 0.486                         | 2.60E-30       | 2.82E-28       |
| <i>ALKBH7</i>          | 19p13.3         | 0.486                         | 2.96E-30       | 3.13E-28       |
| <i>COA3</i>            | 17q21.2         | 0.485                         | 3.25E-30       | 3.41E-28       |
| <i>COX6A1</i>          | 12q24.31        | 0.485                         | 3.32E-30       | 3.47E-28       |
| <i>ABHD17A</i>         | 19p13.3         | 0.485                         | 3.65E-30       | 3.79E-28       |
| <i>VPS28</i>           | 8q24.3          | 0.485                         | 3.66E-30       | 3.79E-28       |
| <i>NDUFA7</i>          | 19p13.2         | 0.484                         | 4.97E-30       | 5.06E-28       |
| <i>RPL37A</i>          | 2q35            | 0.484                         | 5.40E-30       | 5.47E-28       |
| <i>NR2F6</i>           | 19p13.11        | 0.483                         | 6.41E-30       | 6.37E-28       |
| <i>RAB24</i>           | 5q35.3          | 0.483                         | 7.64E-30       | 7.55E-28       |
| <i>RPL34</i>           | 4q25            | 0.482                         | 8.64E-30       | 8.41E-28       |
| <i>TMEM191A</i>        | 22q11.21        | 0.482                         | 9.02E-30       | 8.69E-28       |
| <i>CCDC12</i>          | 3p21.31         | 0.481                         | 1.34E-29       | 1.27E-27       |
| <i>TOMM22</i>          | 22q13.1         | 0.480                         | 1.86E-29       | 1.73E-27       |
| <i>INKA1</i>           | 3p21.31         | 0.478                         | 3.10E-29       | 2.76E-27       |
| <i>MRPL41</i>          | 9q34.3          | 0.477                         | 4.76E-29       | 4.13E-27       |
| <i>TST</i>             | 22q12.3         | 0.476                         | 4.99E-29       | 4.28E-27       |
| <i>RPS19</i>           | 19q13.2         | 0.475                         | 7.68E-29       | 6.44E-27       |
| <i>COX7A2</i>          | 6q14.1          | 0.474                         | 9.64E-29       | 7.83E-27       |
| <i>PRDX5</i>           | 11q13.1         | 0.474                         | 9.96E-29       | 8.02E-27       |
| <i>SNRPD3</i>          | 22q11.23        | 0.474                         | 1.13E-28       | 9.00E-27       |
| <i>UQCR11</i>          | 19p13.3         | 0.474                         | 1.13E-28       | 9.00E-27       |
| <i>NUDT8</i>           | 11q13.2         | 0.474                         | 1.18E-28       | 9.36E-27       |
| <i>UBL5</i>            | 19p13.2         | 0.473                         | 1.48E-28       | 1.16E-26       |
| <i>TRMU</i>            | 22q13.31        | 0.473                         | 1.50E-28       | 1.17E-26       |
| <i>ATF4</i>            | 22q13.1         | 0.473                         | 1.52E-28       | 1.18E-26       |
| <i>YIF1B</i>           | 19q13.2         | 0.473                         | 1.59E-28       | 1.22E-26       |

**Supplementary Table S3.** Top 100 genes with the highest negative expression with *TSPO*.

| Correlated gene | Cytoband        | Spearman's correlation | p-Value  | q-Value  |
|-----------------|-----------------|------------------------|----------|----------|
| <i>ROCK2</i>    | 2p25.1          | -0.597                 | 2.26E-48 | 1.13E-44 |
| <i>ROCK1</i>    | 18q11.1         | -0.593                 | 1.38E-47 | 5.54E-44 |
| <i>RIF1</i>     | 2q23.3          | -0.566                 | 1.17E-42 | 2.35E-39 |
| <i>TRIM44</i>   | 11p13           | -0.564                 | 2.17E-42 | 3.59E-39 |
| <i>NEU3</i>     | 11q13.4         | -0.564                 | 2.33E-42 | 3.59E-39 |
| <i>HELZ</i>     | 17q24.2         | -0.561                 | 7.18E-42 | 8.85E-39 |
| <i>TTBK2</i>    | 15q15.2         | -0.561                 | 7.23E-42 | 8.85E-39 |
| <i>ZNF281</i>   | 1q32.1          | -0.561                 | 7.50E-42 | 8.85E-39 |
| <i>ZKSCAN8</i>  | 6p21            | -0.561                 | 9.75E-42 | 1.09E-38 |
| <i>TAF1L</i>    | 9p21.1          | -0.560                 | 1.43E-41 | 1.51E-38 |
| <i>MED13</i>    | 17q23.2         | -0.556                 | 7.10E-41 | 6.78E-38 |
| <i>NF1</i>      | 17q11.2         | -0.555                 | 8.61E-41 | 7.85E-38 |
| <i>LATS1</i>    | 6q25.1          | -0.552                 | 2.64E-40 | 2.12E-37 |
| <i>ATRX</i>     | Xq21.1          | -0.547                 | 2.08E-39 | 1.49E-36 |
| <i>RGPD4</i>    | 2q12.3          | -0.546                 | 3.40E-39 | 2.28E-36 |
| <i>PHLPP2</i>   | 16q22.2         | -0.545                 | 4.07E-39 | 2.63E-36 |
| <i>MAP3K2</i>   | 2q14.3          | -0.544                 | 5.41E-39 | 3.19E-36 |
| <i>MED1</i>     | 17q12           | -0.538                 | 6.24E-38 | 3.29E-35 |
| <i>UBR1</i>     | 15q15.2         | -0.534                 | 2.75E-37 | 1.35E-34 |
| <i>TCF12</i>    | 15q21.3         | -0.533                 | 3.38E-37 | 1.61E-34 |
| <i>MACF1</i>    | 1p34.3          | -0.532                 | 4.99E-37 | 2.33E-34 |
| <i>RGPD3</i>    | 2q12.2          | -0.530                 | 1.12E-36 | 4.77E-34 |
| <i>RAD54L2</i>  | 3p21.2          | -0.529                 | 1.76E-36 | 7.34E-34 |
| <i>LIMS1</i>    | 2q12.3          | -0.528                 | 2.38E-36 | 9.72E-34 |
| <i>MIGA1</i>    | 1p31.1          | -0.528                 | 2.55E-36 | 1.02E-33 |
| <i>CCNT1</i>    | 12q13.11-q13.12 | -0.526                 | 4.15E-36 | 1.63E-33 |
| <i>ERCC6L2</i>  | 9q22.32         | -0.526                 | 5.17E-36 | 1.99E-33 |
| <i>ERCC4</i>    | 16p13.12        | -0.524                 | 8.16E-36 | 3.09E-33 |
| <i>GCC2</i>     | 2q12.3          | -0.524                 | 8.32E-36 | 3.09E-33 |
| <i>ZNF81</i>    | Xp11.23         | -0.523                 | 1.48E-35 | 5.22E-33 |
| <i>ASAP1</i>    | 8q24.21-q24.22  | -0.523                 | 1.48E-35 | 5.22E-33 |
| <i>PIK3C2A</i>  | 11p15.1         | -0.522                 | 1.57E-35 | 5.45E-33 |
| <i>ZNF106</i>   | 15q15.1         | -0.522                 | 1.61E-35 | 5.47E-33 |
| <i>ASXL2</i>    | 2p23.3          | -0.522                 | 1.84E-35 | 6.05E-33 |
| <i>RBM27</i>    | 5q32            | -0.522                 | 1.92E-35 | 6.20E-33 |
| <i>GPATCH8</i>  | 17q21.31        | -0.522                 | 2.04E-35 | 6.51E-33 |
| <i>ADAT1</i>    | 16q23.1         | -0.522                 | 2.13E-35 | 6.67E-33 |
| <i>SMURF2</i>   | 17q23.3-q24.1   | -0.520                 | 4.26E-35 | 1.28E-32 |
| <i>TAOK1</i>    | 17q11.2         | -0.520                 | 4.28E-35 | 1.28E-32 |
| <i>BBX</i>      | 3q13.12         | -0.519                 | 4.94E-35 | 1.42E-32 |
| <i>INTS2</i>    | 17q23.2         | -0.519                 | 5.98E-35 | 1.67E-32 |
| <i>ZSCAN29</i>  | 15q15.3         | -0.518                 | 7.38E-35 | 2.00E-32 |
| <i>PPP1R12A</i> | 12q21.2-q21.31  | -0.518                 | 8.16E-35 | 2.18E-32 |
| <i>YLPM1</i>    | 14q24.3         | -0.518                 | 8.69E-35 | 2.26E-32 |
| <i>DHX33</i>    | 17p13.2         | -0.517                 | 1.03E-34 | 2.63E-32 |
| <i>PHF3</i>     | 6q12            | -0.516                 | 1.37E-34 | 3.37E-32 |
| <i>FAM168A</i>  | 11q13.4         | -0.516                 | 1.41E-34 | 3.41E-32 |
| <i>DPP8</i>     | 15q22.31        | -0.515                 | 1.93E-34 | 4.56E-32 |
| <i>ADAM10</i>   | 15q21.3         | -0.515                 | 1.98E-34 | 4.61E-32 |
| <i>BIRC6</i>    | 2p22.3          | -0.515                 | 2.09E-34 | 4.83E-32 |
| <i>UGGT1</i>    | 2q14.3          | -0.515                 | 2.31E-34 | 5.26E-32 |
| <i>CBL</i>      | 11q23.3         | -0.515                 | 2.42E-34 | 5.46E-32 |
| <i>REST</i>     | 4q12            | -0.514                 | 2.96E-34 | 6.53E-32 |
| <i>TGFBRAP1</i> | 2q12.1-q12.2    | -0.514                 | 3.22E-34 | 6.94E-32 |
| <i>N4BP2</i>    | 4p14            | -0.512                 | 5.19E-34 | 1.09E-31 |
| <i>MDN1</i>     | 6q15            | -0.512                 | 5.28E-34 | 1.09E-31 |

**Supplementary Table S3 (continued).** Top 100 genes with the highest negative expression with *TSPO*.

| <b>Correlated gene</b> | <b>Cytoband</b> | <b>Spearman's correlation</b> | <b>p-Value</b> | <b>q-Value</b> |
|------------------------|-----------------|-------------------------------|----------------|----------------|
| <i>PTPN11</i>          | 12q24.13        | -0.512                        | 6.29E-34       | 1.29E-31       |
| <i>MGAT5</i>           | 2q21.2-q21.3    | -0.510                        | 1.03E-33       | 2.07E-31       |
| <i>PDE3A</i>           | 12p12.2         | -0.510                        | 1.04E-33       | 2.07E-31       |
| <i>TAF1</i>            | Xq13.1          | -0.510                        | 1.10E-33       | 2.15E-31       |
| <i>KIRREL1</i>         | 1q23.1          | -0.510                        | 1.17E-33       | 2.26E-31       |
| <i>CASP8AP2</i>        | 6q15            | -0.510                        | 1.33E-33       | 2.54E-31       |
| <i>ANKRD40</i>         | 17q21.33        | -0.509                        | 1.81E-33       | 3.36E-31       |
| <i>KLHL11</i>          | 17q21.2         | -0.508                        | 2.35E-33       | 4.33E-31       |
| <i>MGA</i>             | 15q15           | -0.508                        | 2.42E-33       | 4.41E-31       |
| <i>MYO9A</i>           | 15q23           | -0.505                        | 6.12E-33       | 1.10E-30       |
| <i>SPTBN1</i>          | 2p16.2          | -0.505                        | 7.14E-33       | 1.27E-30       |
| <i>ZFR</i>             | 5p13.3          | -0.504                        | 8.16E-33       | 1.41E-30       |
| <i>CKAP5</i>           | 11p11.2         | -0.504                        | 9.53E-33       | 1.62E-30       |
| <i>REV3L</i>           | 6q21            | -0.503                        | 1.09E-32       | 1.84E-30       |
| <i>MED13L</i>          | 12q24.21        | -0.503                        | 1.34E-32       | 2.21E-30       |
| <i>PDPR</i>            | 16q22.1         | -0.502                        | 1.39E-32       | 2.29E-30       |
| <i>RAB11FIP2</i>       | 10q26.11        | -0.501                        | 1.92E-32       | 3.11E-30       |
| <i>RASSF8</i>          | 12p12.1         | -0.501                        | 2.66E-32       | 4.28E-30       |
| <i>UBXN7</i>           | 3q29            | -0.500                        | 2.74E-32       | 4.36E-30       |
| <i>TBCEL</i>           | 11q23.3         | -0.500                        | 2.77E-32       | 4.37E-30       |
| <i>PRKDC</i>           | 8q11.21         | -0.500                        | 2.79E-32       | 4.38E-30       |
| <i>GTF2A1</i>          | 14q31.1         | -0.500                        | 2.87E-32       | 4.42E-30       |
| <i>MTR</i>             | 1q43            | -0.500                        | 2.87E-32       | 4.42E-30       |
| <i>ATF2</i>            | 2q31.1          | -0.500                        | 3.10E-32       | 4.74E-30       |
| <i>TEAD1</i>           | 11p15.3         | -0.500                        | 3.30E-32       | 4.99E-30       |
| <i>CEP170</i>          | 1q43            | -0.500                        | 3.39E-32       | 5.07E-30       |
| <i>STK4</i>            | 20q13.12        | -0.499                        | 5.08E-32       | 7.38E-30       |
| <i>IL6ST</i>           | 5q11.2          | -0.498                        | 5.48E-32       | 7.85E-30       |
| <i>SEL1L</i>           | 14q31           | -0.498                        | 6.00E-32       | 8.50E-30       |
| <i>TRIO</i>            | 5p15.2          | -0.498                        | 6.02E-32       | 8.50E-30       |
| <i>ADNP</i>            | 20q13.13        | -0.496                        | 1.01E-31       | 1.39E-29       |
| <i>CDC27</i>           | 17q21.32        | -0.496                        | 1.08E-31       | 1.48E-29       |
| <i>TP53BP1</i>         | 15q15.3         | -0.495                        | 1.69E-31       | 2.28E-29       |
| <i>SHPRH</i>           | 6q24.3          | -0.494                        | 2.10E-31       | 2.79E-29       |
| <i>CDK12</i>           | 17q12           | -0.494                        | 2.24E-31       | 2.96E-29       |
| <i>KDM5A</i>           | 12p13.33        | -0.493                        | 2.59E-31       | 3.37E-29       |
| <i>ANKRD36BP1</i>      | 1q24.2          | -0.493                        | 2.91E-31       | 3.76E-29       |
| <i>SLX4IP</i>          | 20p12.2         | -0.492                        | 3.72E-31       | 4.75E-29       |
| <i>SON</i>             | 21q22.11        | -0.492                        | 3.97E-31       | 5.04E-29       |
| <i>SMG1</i>            | 16p12.3         | -0.492                        | 4.13E-31       | 5.21E-29       |
| <i>PCNX1</i>           | 14q24.2         | -0.492                        | 4.37E-31       | 5.44E-29       |
| <i>PALM2AKAP2</i>      | 9q31.3          | -0.492                        | 4.69E-31       | 5.81E-29       |
| <i>RANBP2</i>          | 2q13            | -0.491                        | 4.84E-31       | 5.95E-29       |
| <i>TGOLN2</i>          | 2p11.2          | -0.491                        | 5.45E-31       | 6.59E-29       |

**Supplementary Table S4.** Univariate survival analyses of TSPO expression and clinicopathological features of patients with HNSCC in the TMA patient cohort.

|              | TSPO expression | OS                          |                     | DSS                         |                     | DFS                         |                     |              |
|--------------|-----------------|-----------------------------|---------------------|-----------------------------|---------------------|-----------------------------|---------------------|--------------|
|              |                 | Survival effect HR (95% CI) | p-value             | Survival effect HR (95% CI) | p-value             | Survival effect HR (95% CI) | p-value             |              |
| <b>T</b>     | T1–T2           | Low                         | 1                   | -                           | 1                   | -                           | 1                   | -            |
|              |                 | High                        | 0.687 (0.476–0.992) | <b>0.045</b>                | 0.469 (0.289–0.760) | <b>0.002</b>                | 0.627 (0.414–0.949) | <b>0.027</b> |
|              | T3–T4           | Low                         | 1                   | -                           | 1                   | -                           | 1                   | -            |
|              |                 | High                        | 0.864 (0.632–1.180) | 0.357                       | 0.822 (0.575–1.174) | 0.281                       | 1.209 (0.767–1.905) | 0.413        |
| <b>N</b>     | N0              | Low                         | 1                   | -                           | 1                   | -                           | 1                   | -            |
|              |                 | High                        | 0.713 (0.502–1.012) | 0.058                       | 0.567 (0.355–0.908) | <b>0.018</b>                | 0.868 (0.553–1.361) | 0.537        |
|              | N+              | Low                         | 1                   | -                           | 1                   | -                           | 1                   | -            |
|              |                 | High                        | 0.722 (0.526–0.992) | <b>0.044</b>                | 0.658 (0.459–0.941) | <b>0.022</b>                | 0.715 (0.469–1.089) | 0.118        |
| <b>Stage</b> | 0–II            | Low                         | 1                   | -                           | 1                   | -                           | 1                   | -            |
|              |                 | High                        | 0.733 (0.461–1.164) | 0.188                       | 0.430 (0.222–0.835) | <b>0.013</b>                | 0.613 (0.365–1.031) | 0.065        |
|              | III–IV          | Low                         | 1                   | -                           | 1                   | -                           | 1                   | -            |
|              |                 | High                        | 0.764 (0.582–1.003) | 0.053                       | 0.722 (0.527–0.988) | <b>0.042</b>                | 0.939 (0.646–1.364) | 0.740        |
| <b>Grade</b> | G1              | Low                         | 1                   | -                           | 1                   | -                           | 1                   | -            |
|              |                 | High                        | 0.766 (0.470–1.251) | 0.287                       | 0.554 (0.297–1.033) | 0.063                       | 0.674 (0.384–1.181) | 0.168        |
|              | G2              | Low                         | 1                   | -                           | 1                   | -                           | 1                   | -            |
|              |                 | High                        | 0.629 (0.440–0.899) | <b>0.011</b>                | 0.571 (0.376–0.868) | <b>0.009</b>                | 0.706 (0.451–1.106) | 0.128        |
|              | G3              | Low                         | 1                   | -                           | 1                   | -                           | 1                   | -            |
|              |                 | High                        | 0.772 (0.493–1.209) | 0.258                       | 0.667 (0.390–1.139) | 0.138                       | 1.029 (0.539–1.965) | 0.931        |

TSPO staining intensity scores of 0–1 were considered low and scores 2–3 as high. Statistical significance was calculated using Cox’s proportional hazard model. p-values < 0.05 were considered statistically significant (shown in bold). OS = overall survival, DSS = disease-specific survival, DFS = disease-free survival, HR = hazard ratio, CI = confidence interval.











**Supplementary Table S7.** Abbreviations for cancer types listed in Figure 4D.

| <b>Abbreviation</b> | <b>Cancer</b>                         |
|---------------------|---------------------------------------|
| ACC                 | Adrenocortical carcinoma              |
| BLCA                | Bladder urothelial carcinoma          |
| BRCA                | Breast invasive carcinoma             |
| CESC                | Cervical and endocervical cancers     |
| CHOL                | Cholangiocarcinoma                    |
| COAD                | Colon adenocarcinoma                  |
| ESCA                | Esophageal carcinoma                  |
| KICH                | Kidney chromophobe                    |
| KIRC                | Kidney renal clear cell carcinoma     |
| KIRP                | Kidney renal papillary cell carcinoma |
| LIHC                | Liver hepatocellular carcinoma        |
| LUAD                | Lung adenocarcinoma                   |
| LUSC                | Lung squamous cell carcinoma          |
| MESO                | Mesothelioma                          |
| OV                  | Ovarian serous cystadenocarcinoma     |
| PAAD                | Pancreatic adenocarcinoma             |
| PCPG                | Pheochromocytoma and paraganglioma    |
| PRAD                | Prostate adenocarcinoma               |
| READ                | Rectum adenocarcinoma                 |
| SARC                | Sarcoma                               |
| SKCM                | Skin cutaneous melanoma               |
| STAD                | Stomach adenocarcinoma                |
| THCA                | Thyroid carcinoma                     |
| UCEC                | Uterine corpus endometrial carcinoma  |
| UCS                 | Uterine carcinosarcoma                |
| UVM                 | Uveal melanoma                        |

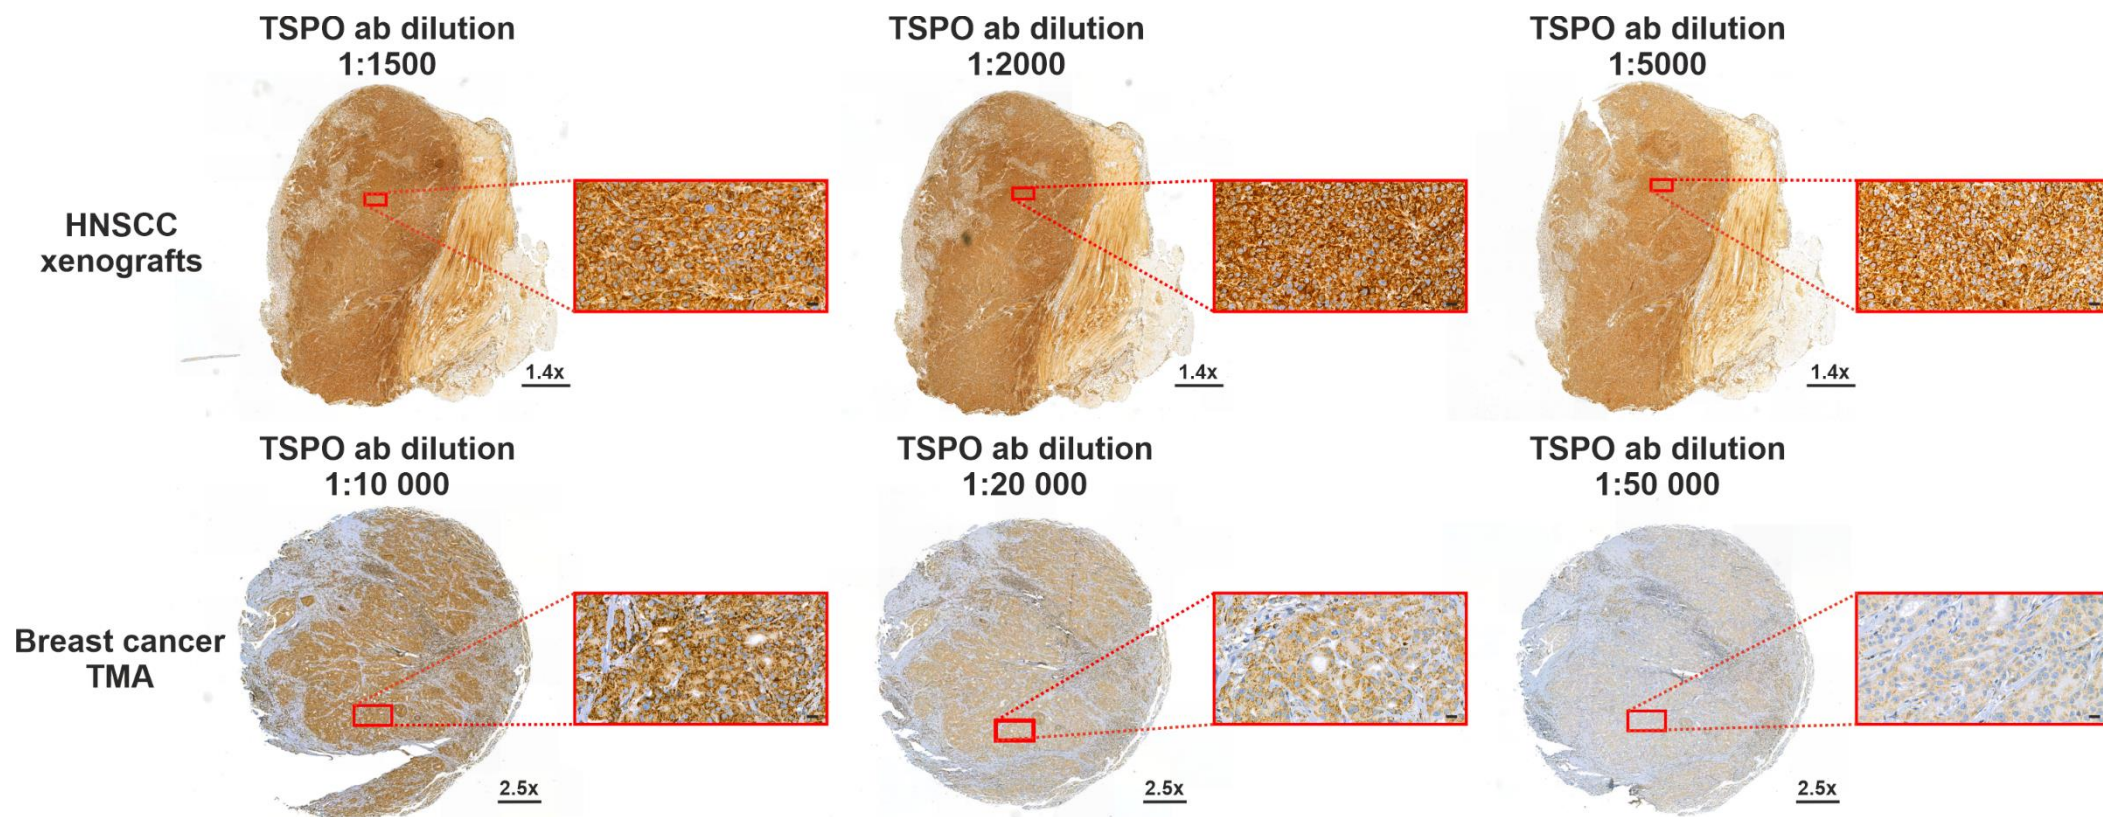

**Supplementary Fig. S1 TSPO IHC optimization.** TSPO IHC staining with different antibody (monoclonal rabbit TSPO antibody, Abcam ab109497) dilutions were performed to find the optimal antibody dilution for TMA IHC stainings. Stainings were done with HNSCC xenograft tumors and breast cancer TMAs. 1:50 000 dilution was found to be the most optimal for stainings. Scale bars for xenograft tumors: 1000 μm (whole section) and 20 μm (inset). Scale bars for breast cancer TMA sections: 500 μm (whole section) and 20 μm (inset).

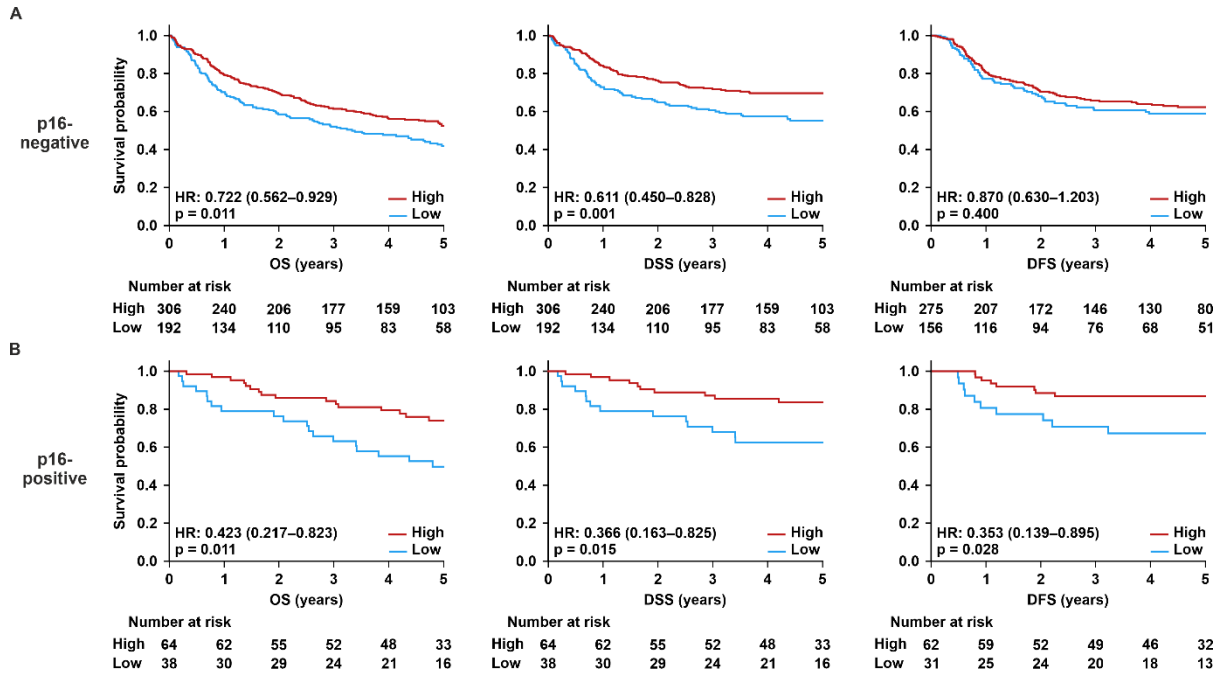

**Supplementary Fig. S2 Effect of p16 and TSP0 expression on survival in the TMA cohort.** Prognostic trends with HR (95% CI) for 5-year overall survival (OS), disease-specific survival (DSS), and disease-free survival (DFS) divided into low and high (staining intensity scores of 0–1 and 2–3, respectively) TSP0 tumor expression in patients with (A) p16-negative or (B) p16-positive tumors. Statistical significance was calculated using Cox’s proportional hazard model. p-values < 0.05 were considered statistically significant.

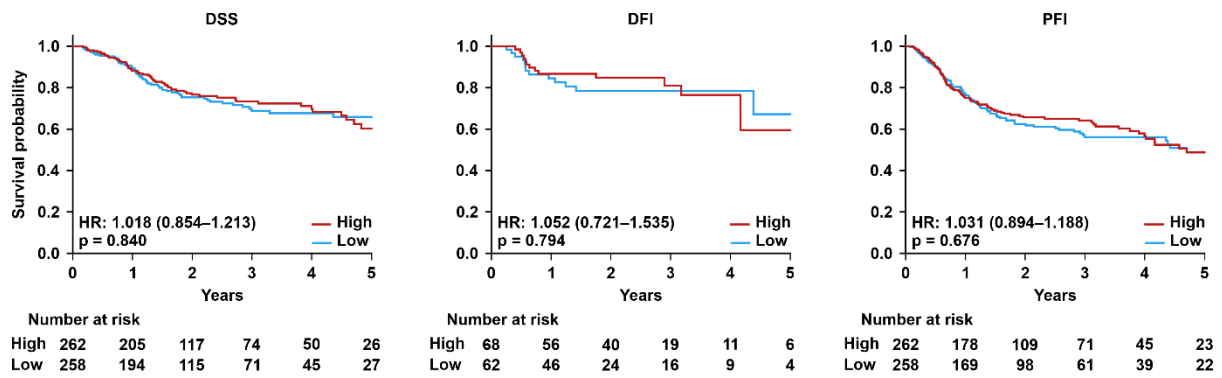

**Supplementary Fig. S3 Effect of *TSPO* expression on survival in the TCGA HNSCC cohort.** Prognostic trends with HR (95% CI) for 5-year disease-specific survival (DSS), disease-free interval (DFI), and progression-free interval (PFI) in low (below median) and high (equal to or above median) *TSPO* expression in all patients. Statistical significance was calculated using Cox's proportional hazard model. p-values < 0.05 were considered statistically significant.

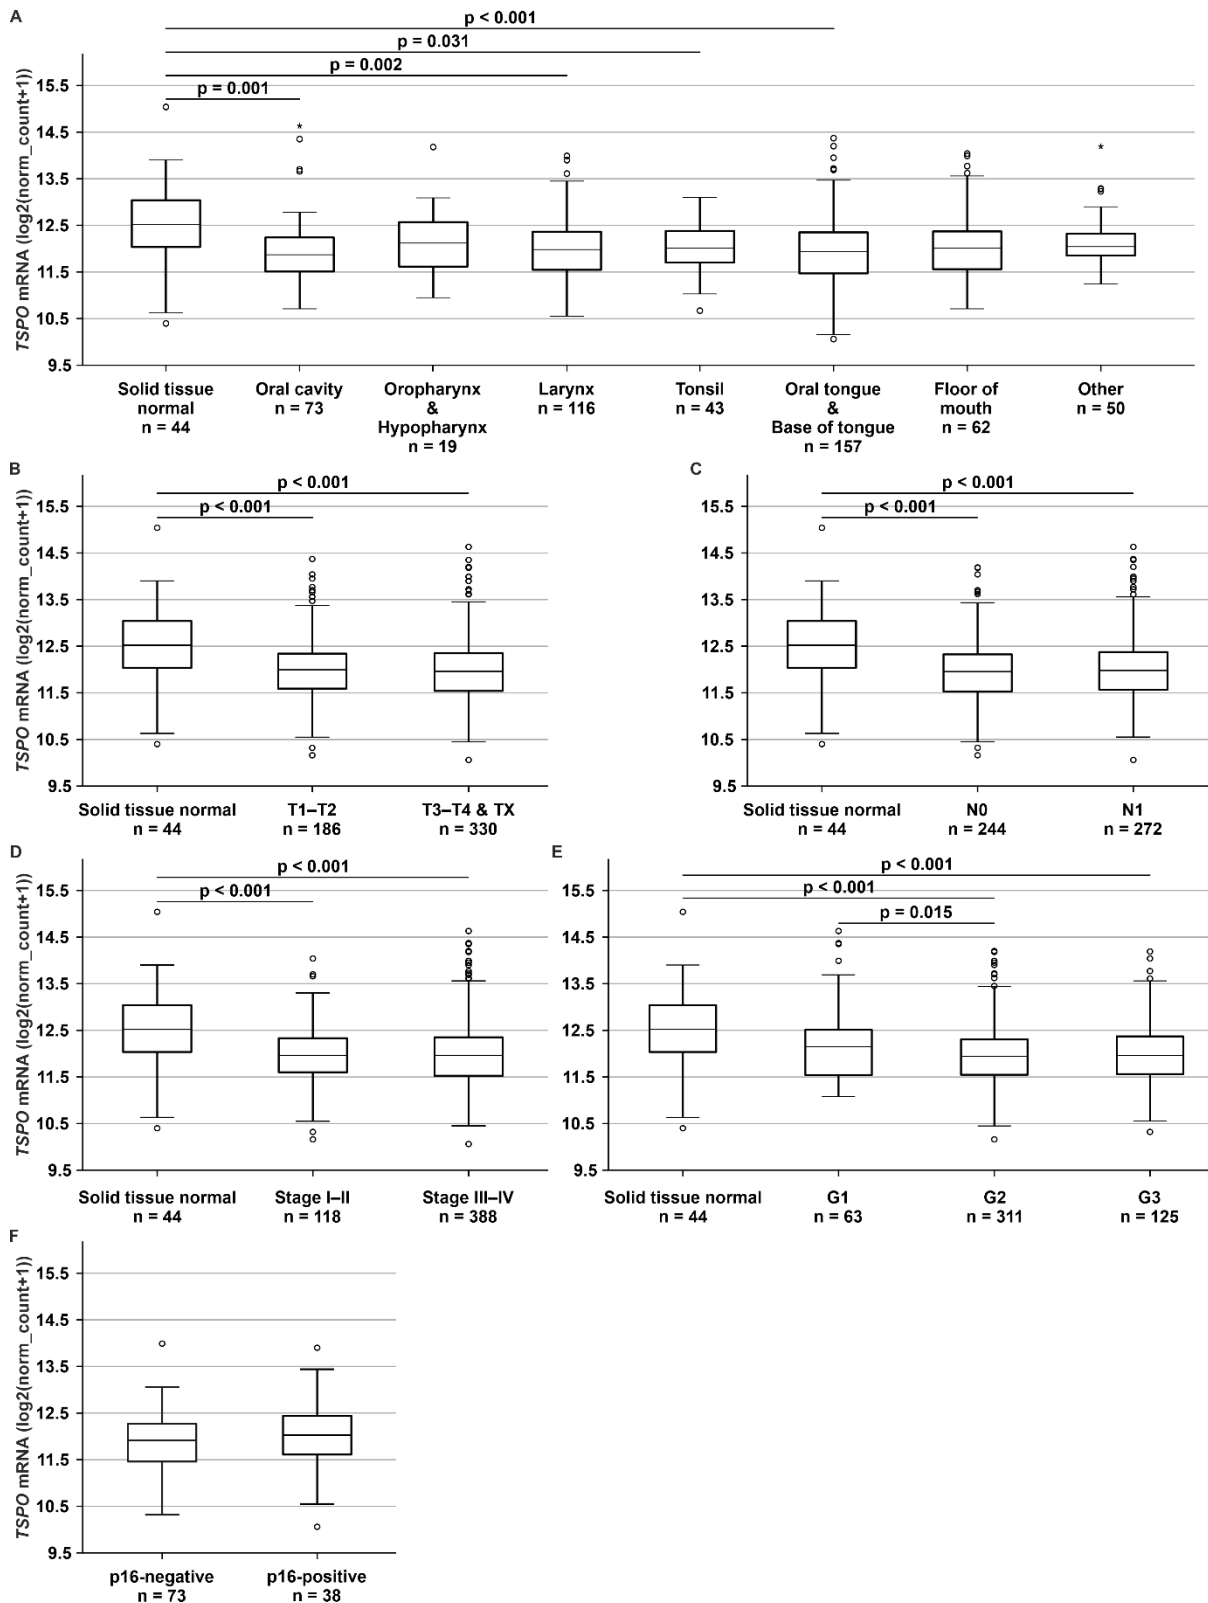

**Supplementary Fig. S4 *TSPO* expression in clinicopathological subgroups from the TCGA HNSCC cohort.** Boxplots visualizing *TSPO* expression according to (A) primary tumor site, (B) T classification, (C) N classification, (D) overall stage, (E) grade, and (F) p16 status. The box ranges from Q1 (first quartile) to Q3 (third quartile) of the median distribution, and the whiskers represent the range between minimum and maximum. Dots represent outlier values. Independent samples t-test (for comparing two groups) or one-way ANOVA with Bonferroni post hoc tests (for comparing more than two groups) was used to analyze differences in *TSPO* expression. p-values < 0.05 were considered statistically significant.



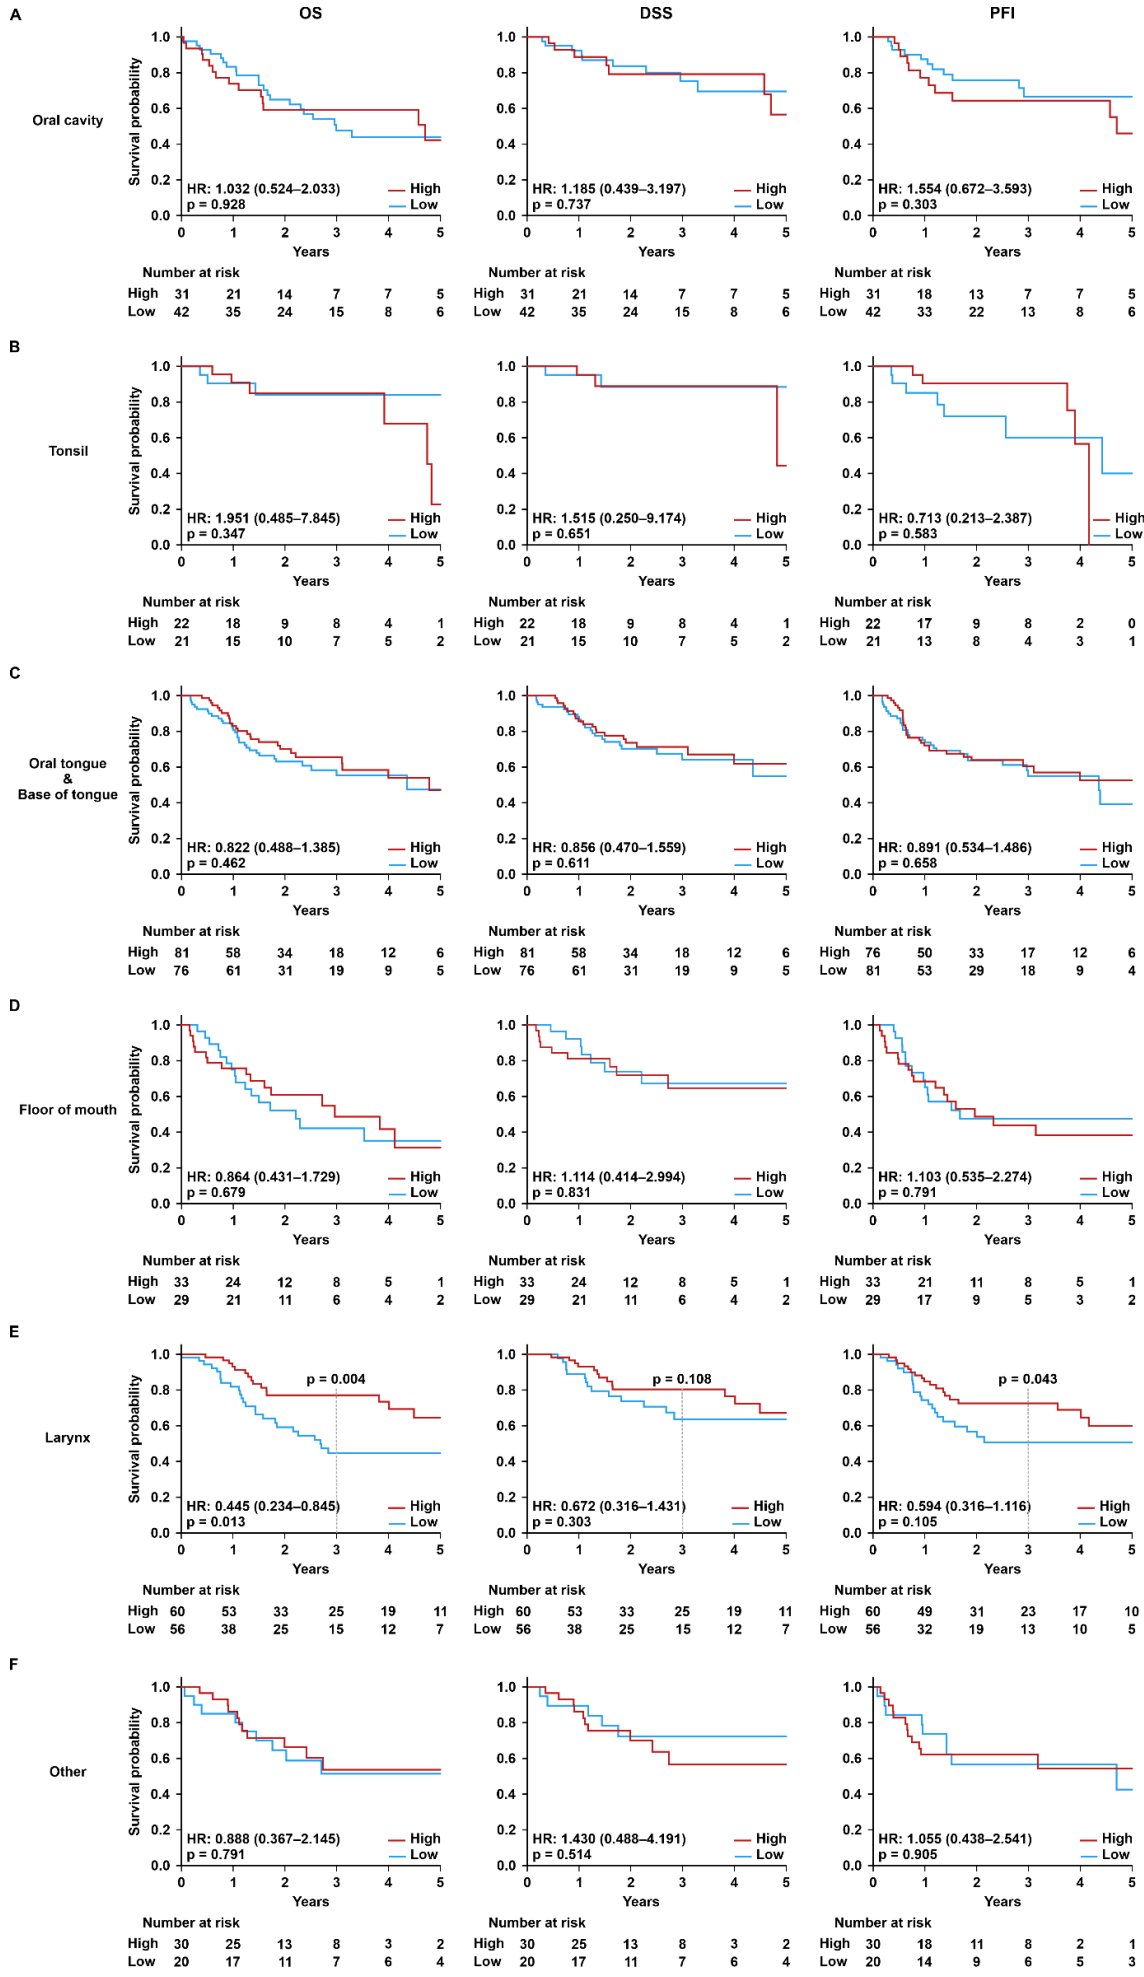

**Supplementary Fig. S5 *TSPO* expression and site-specific survival analyses from the HNSCC TCGA cohort.** Prognostic trends with HR (95% CI) for 5-year overall survival (OS), disease-specific survival (DSS), and progression-free interval (PFI) for *TSPO* expression in (A) oral cavity, (B) tonsil, (C) oral tongue and base of tongue, (D) floor of mouth, (E) larynx, and (F) other tumor sites. *TSPO* expression was divided into low (expression below median) and high (expression equal to or above median). Statistical significance was calculated using Cox's proportional hazard model. p-values < 0.05 were considered statistically significant.

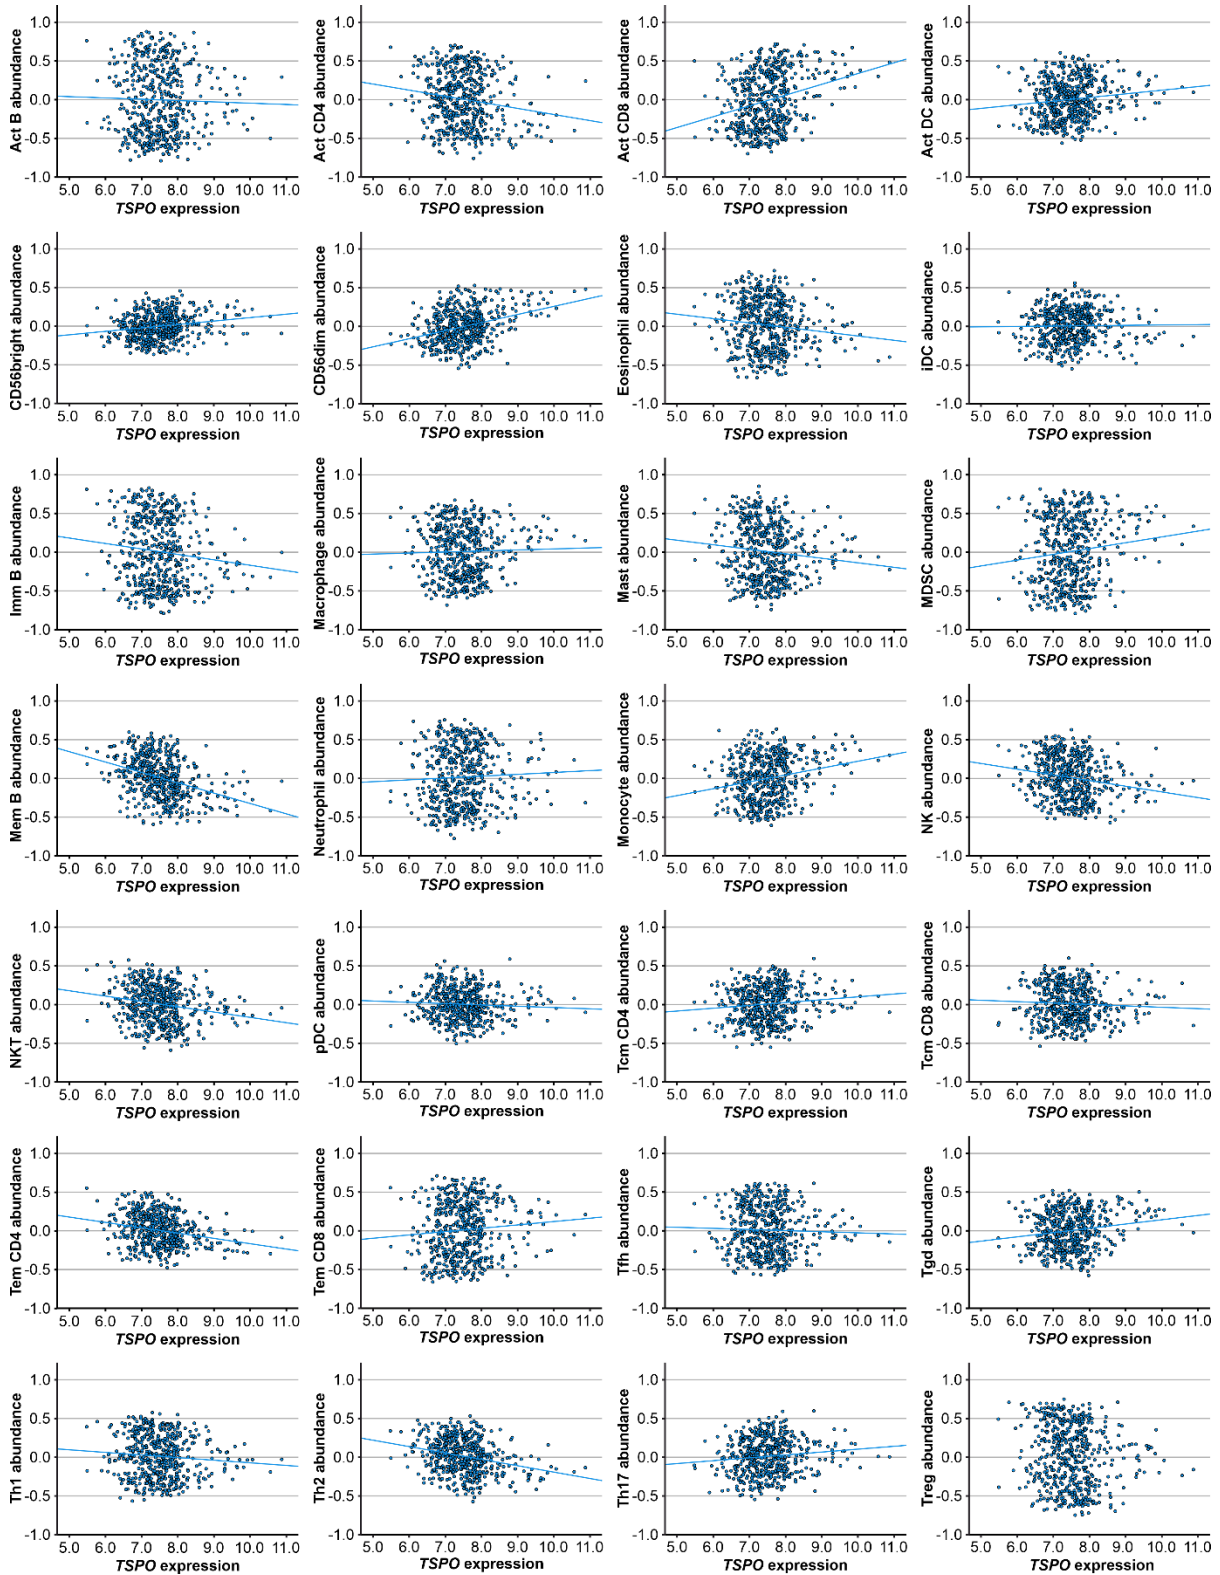

**Supplementary Fig. S6 Scatter plots of immune cell abundance in relation to *TSPO* expression in HNSCC.** The heatmap is shown in Figure 4D. Act = activated, IDC = interstitial dendritic cell, Imm = immature, MDSC = myeloid-derived suppressor cell, Mem = memory, NK = natural killer cell, NKT = natural killer T cell, pDC = plasmacytoid dendritic cell, Tcm = central memory cell, Tem = effector memory cell, Tfh = T follicular helper cell, Tgd = gamma delta T cell, Th1 = type 1 T helper cell, Th2 = type 2 T helper cell, Th17 = type 17 T helper cell, Treg = regulatory T cell.

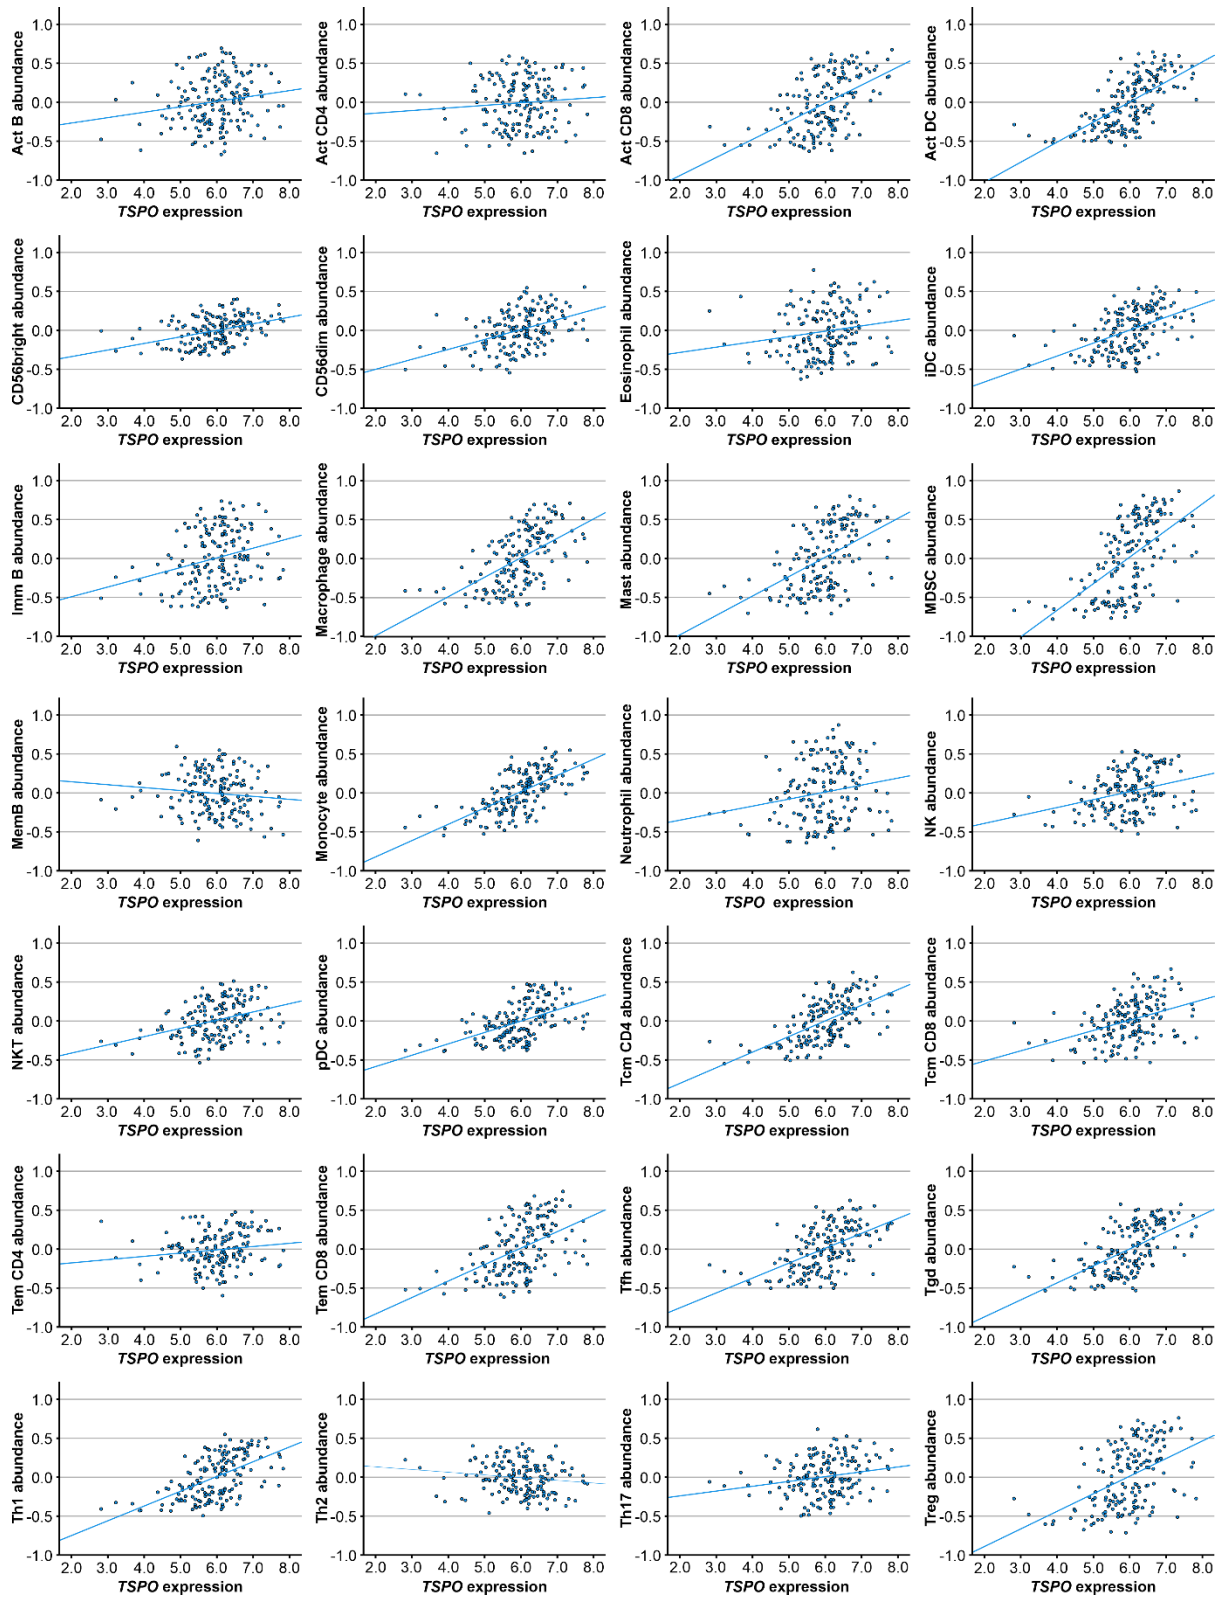

**Supplementary Fig. S7 Scatter plots of immune cell abundance in relation to *TSPO* expression in glioblastoma (GBM).** The heatmap is shown in Figure 4D. Act = activated, IDC = interstitial dendritic cell, Imm = immature, MDSC = myeloid-derived suppressor cell, Mem = memory, NK = natural killer cell, NKT = natural killer T cell, pDC = plasmacytoid dendritic cell, Tcm = central memory cell, Tem = effector memory cell, Tfh = T follicular helper cell, Tgd = gamma delta T cell, Th1 = type 1 T helper cell, Th2 = type 2 T helper cell, Th17 = type 17 T helper cell, Treg = regulatory T cell.

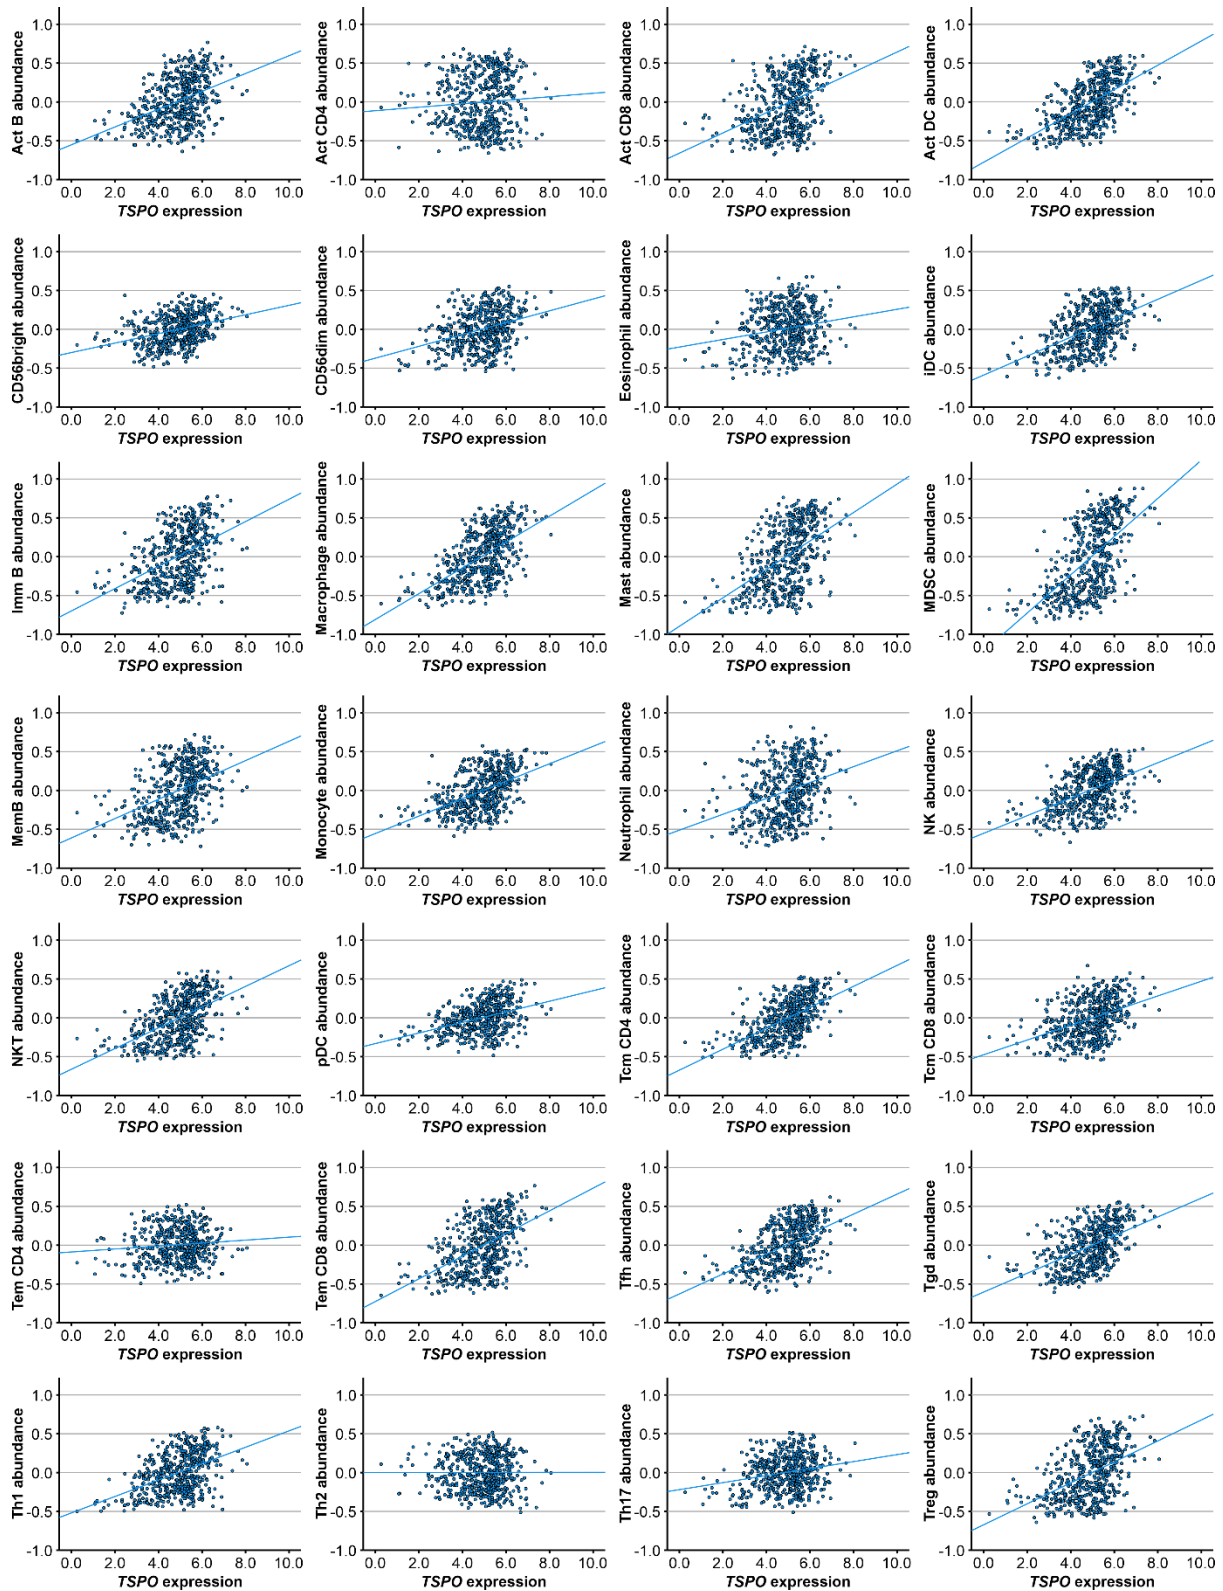

**Supplementary Fig. S8 Scatter plots of immune cell abundance in relation to *TSPO* expression in lower grade glioma (LGG).** The heatmap is shown in Figure 4D. Act = activated, IDC = interstitial dendritic cell, Imm = immature, MDSC = myeloid-derived suppressor cell, Mem = memory, NK = natural killer cell, NKT = natural killer T cell, pDC = plasmacytoid dendritic cell, Tcm = central memory cell, Tem = effector memory cell, Tfh = T follicular helper cell, Tgd = gamma delta T cell, Th1 = type 1 T helper cell, Th2 = type 2 T helper cell, Th17 = type 17 T helper cell, Treg = regulatory T cell.

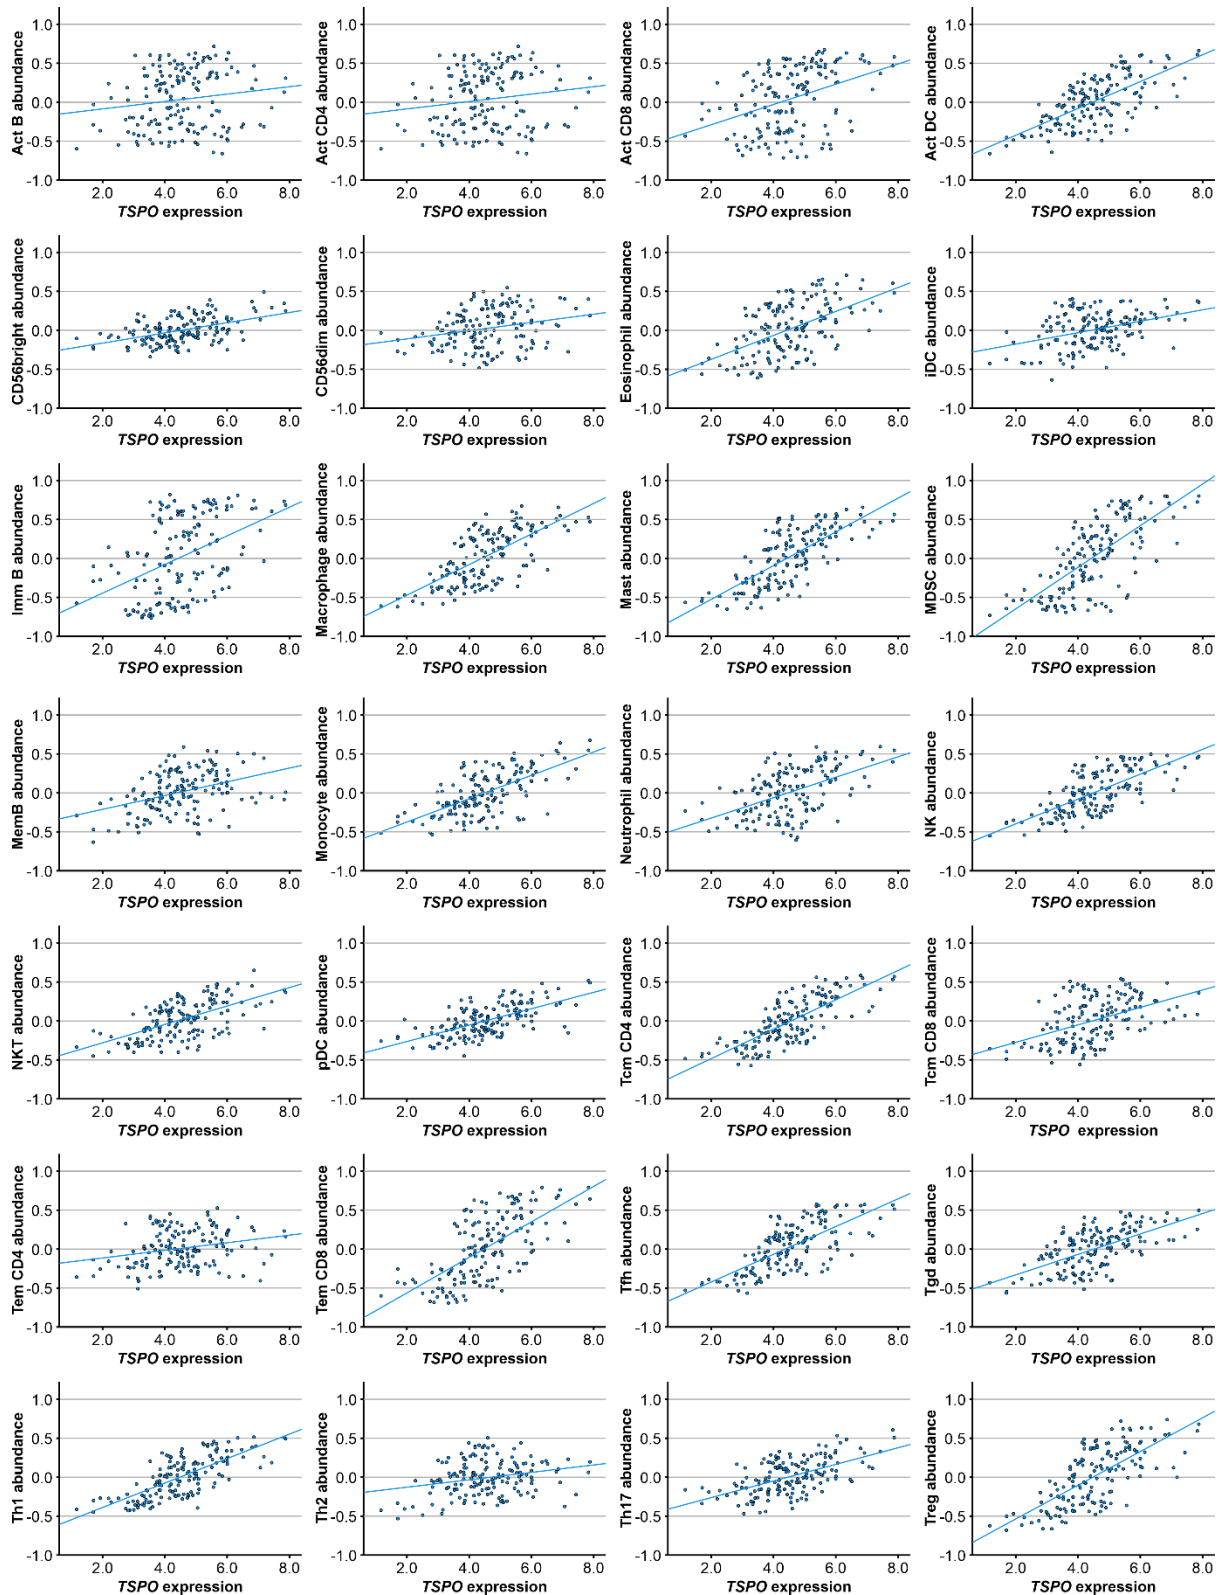

**Supplementary Fig. S9 Scatter plots of immune cell abundance in relation to *TSPO* expression in testicular germ cell tumors (TGCT).** The heatmap is shown in Figure 4D. Act = activated, IDC = interstitial dendritic cell, Imm = immature, MDSC = myeloid-derived suppressor cell, Mem = memory, NK = natural killer cell, NKT = natural killer T cell, pDC = plasmacytoid dendritic cell, Tcm = central memory cell, Tem = effector memory cell, Tfh = T follicular helper cell, Tgd = gamma delta T cell, Th1 = type 1 T helper cell, Th2 = type 2 T helper cell, Th17 = type 17 T helper cell, Treg = regulatory T cell.
